# Supplementary material for: DNA metabarcoding highlights cyanobacteria as the main source of primary production in a pelagic food web model
Source: PubMed Central journal article supplement (PMC10132751; doi:10.1126/sciadv.adg1096), 2023-04-26
Supplement: sciadv.adg1096_sm.pdf [file sciadv.adg1096_sm.pdf]

Supplementary Materials for  
**DNA metabarcoding highlights cyanobacteria as the main source of primary  
production in a pelagic food web model**

Andreas Novotny *et al.*

Corresponding author: Andreas Novotny, [mail@andreasnovotny.se](mailto:mail@andreasnovotny.se); Monika Winder, [monika.winder@su.se](mailto:monika.winder@su.se)

*Sci. Adv.* **9**, eadg1096 (2023)  
DOI: 10.1126/sciadv.adg1096

**This PDF file includes:**

Figs. S1 and S2  
Tables S1 to S3  
Data S1

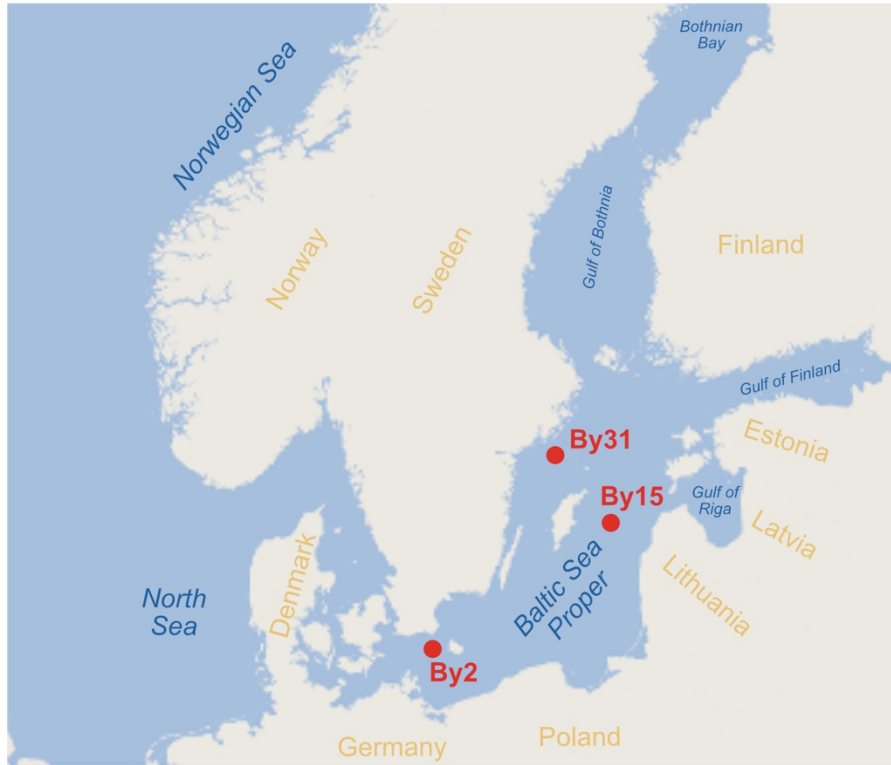

**Fig. S1: Map of sampling stations.** The map is retrieved from the Swedish national archive for oceanographic data: <https://sharkweb.smhi.se/>.

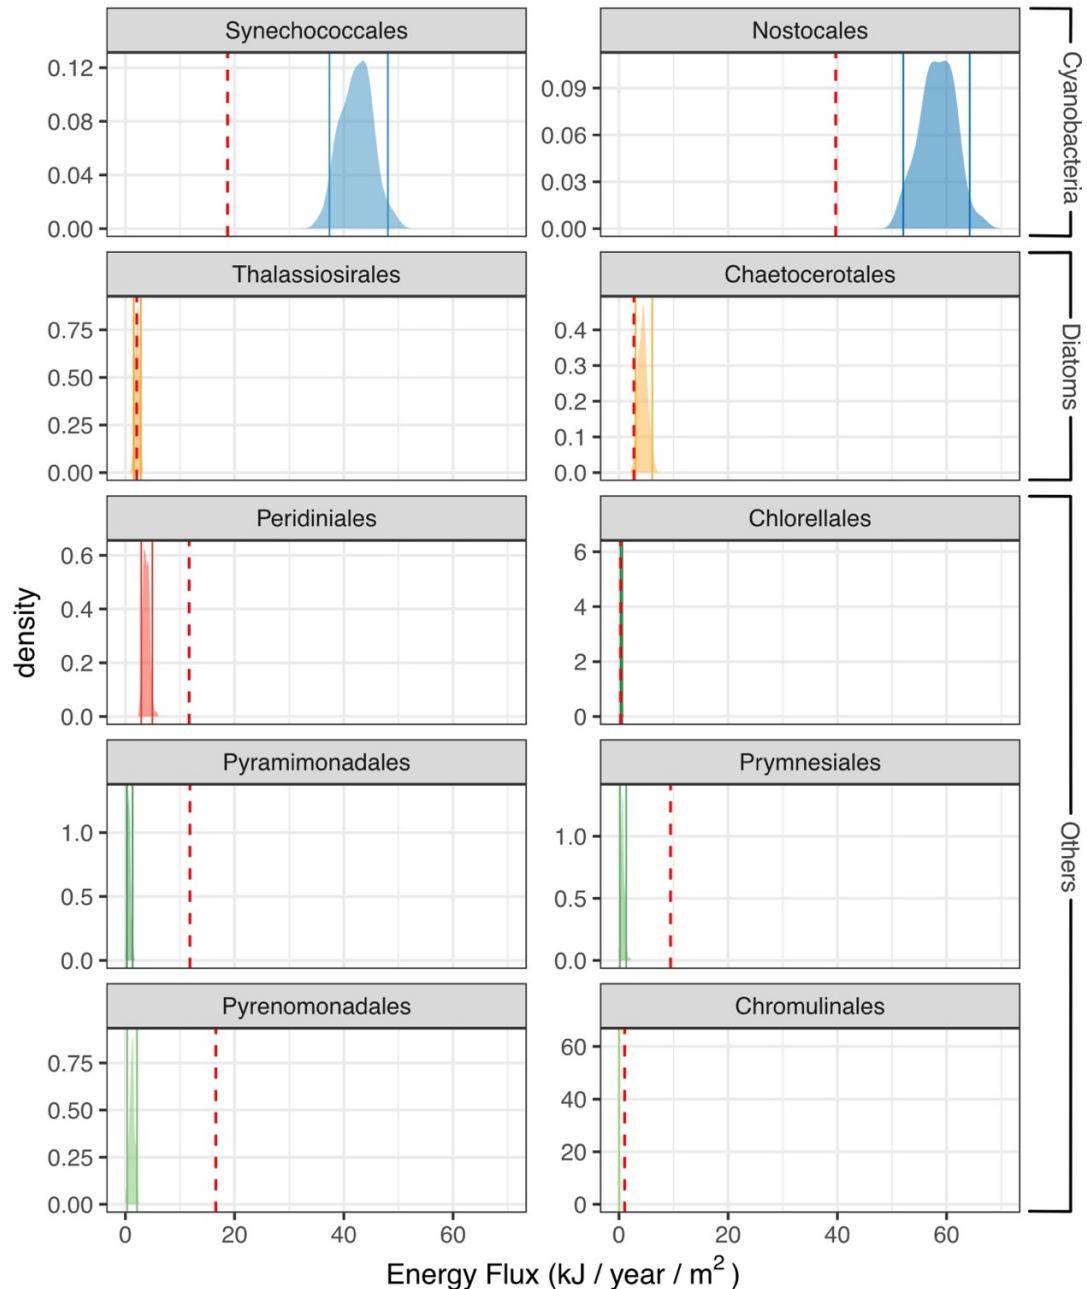

**Fig. S2: The influence of uncertainty in prey selectivity on modeled annual secondary production.**

To evaluate the influence of uncertainty in prey selectivity on the food web model, we calculated each primary producer's average contribution to secondary production by bootstrapping the selectivity dataset. Density plots show the posterior distribution of average detected energy fluxes over the 100 bootstrap replicates, and solid lines indicates 95% confidence interval of the mean detected energy flux (contribution to primary production). The red dashed lines indicate a null-model scenario that assumes no specific selectivity between predators and prey. The figure indicates that cyanobacteria are the main source of primary production, even when accounting for uncertainty of zooplankton selectivity. The figure also indicates that the model outcome is driven by feeding preferences.

**Table S1: Average detected energy flux per prey.**

| <b>Energy Flux<br/>(kJ/m<sup>2</sup>/year)</b> | <i>Temora</i> | <i>Centropages</i> | <i>Pseudocalanus</i> | <i>Acartia</i> | <i>Evadne</i> | <i>Bosmina</i> | <i>Synchaeta</i> | <i>Keratella</i> | <b>Total</b>  |
|------------------------------------------------|---------------|--------------------|----------------------|----------------|---------------|----------------|------------------|------------------|---------------|
| Nostocales                                     | 10.10         | 4.18               | 6.67                 | 17.50          | 0.58          | 11.12          | 2.16             | 0.21             | 52.52         |
| Peridinales                                    | 4.23          | 1.12               | 1.95                 | 1.93           | 0.00          | 0.09           | 2.49             | 0.00             | 11.81         |
| Chaetocerotales                                | 1.65          | 0.91               | 1.44                 | 2.24           | 0.08          | 0.12           | 0.15             | 0.00             | 6.59          |
| Thalassiosirales                               | 1.87          | 1.35               | 0.53                 | 1.52           | 0.01          | 0.00           | 0.00             | 0.00             | 5.29          |
| Chromulinales                                  | 0.11          | 0.01               | 0.03                 | 0.02           | 0.00          | 0.01           | 0.00             | 0.00             | 0.18          |
| Pyrenomonadales                                | 0.86          | 1.09               | 0.00                 | 0.02           | 0.00          | 0.15           | 0.19             | 0.00             | 2.32          |
| Prymnesiales                                   | 0.00          | 0.00               | 0.32                 | 0.07           | 0.04          | 0.25           | 0.37             | 0.00             | 1.04          |
| Pyramimonadales                                | 2.63          | 0.09               | 0.03                 | 0.40           | 0.00          | 0.04           | 0.00             | 0.00             | 3.19          |
| Chlorellales                                   | 0.23          | 0.15               | 0.03                 | 0.01           | 0.00          | 0.01           | 0.00             | 0.00             | 0.43          |
| Synechococcales                                | 20.04         | 5.76               | 0.95                 | 2.53           | 0.12          | 1.12           | 0.19             | 0.01             | 30.73         |
| <b>Total</b>                                   | <b>41.73</b>  | <b>14.66</b>       | <b>11.96</b>         | <b>26.24</b>   | <b>0.83</b>   | <b>12.90</b>   | <b>5.56</b>      | <b>0.22</b>      | <b>114.10</b> |

**Table S2:** Stations, dates, and zooplankton species used to calculate the diet preferences (selectivity indices) used in the network model. Prey composition in the water was identified at all sampling events. Each replicate indicates a barcoding library based on 5-12 pooled zooplankton individuals.

| Station                                                      | Date                                                        | Species Sampled              | n.                         | Ref.       |   |
|--------------------------------------------------------------|-------------------------------------------------------------|------------------------------|----------------------------|------------|---|
| <b>By31</b><br>Landsort Deep<br>Lat:58.59367<br>Lon:18.23640 | 2017-06-19                                                  | <i>Acartia</i> spp.          | 2                          | 18 and 20  |   |
|                                                              |                                                             | <i>Centropages hamatus</i>   | 4                          |            |   |
|                                                              |                                                             | <i>Evadne nordmanni</i>      | 5                          |            |   |
|                                                              |                                                             | <i>Pseudocalanus</i> spp.    | 5                          |            |   |
|                                                              |                                                             | <i>Temora longicornis</i>    | 6                          |            |   |
|                                                              |                                                             | <i>Synchaeta baltica</i>     | 9                          |            |   |
|                                                              | 2017-08-15                                                  | <i>Acartia</i> spp.          | 8                          |            |   |
|                                                              |                                                             | <i>Bosmina</i> spp.          | 5                          |            |   |
|                                                              |                                                             | <i>Centropages hamatus</i> . | 5                          |            |   |
| <i>Pseudocalanus</i> spp.                                    |                                                             | 5                            |                            |            |   |
| <i>Temora longicornis</i>                                    |                                                             | 5                            |                            |            |   |
| <i>Synchaeta baltica</i>                                     |                                                             | 4                            |                            |            |   |
| 2018-03-19                                                   | <i>Keratella</i> spp.                                       | 5                            |                            |            |   |
|                                                              | <i>Acartia</i> spp.                                         | 4                            |                            |            |   |
|                                                              | <i>Pseudocalanus</i> spp.                                   | 6                            |                            |            |   |
|                                                              | <i>Temora longicornis</i>                                   | 4                            |                            |            |   |
| <b>By15</b><br>Gotland Deep<br>Lat:57.31222<br>Lon:20.07620  | 2019-06-01                                                  | <i>Synchaeta baltica</i>     | 5                          | This Study |   |
|                                                              |                                                             | <i>Acartia</i> spp.          | 1                          |            |   |
|                                                              |                                                             | <i>Centropages hamatus</i>   | 4                          |            |   |
|                                                              |                                                             | <i>Temora longicornis</i>    | 2                          |            |   |
|                                                              |                                                             | <i>Evadne nordmanni</i>      | 1                          |            |   |
|                                                              | 2020-09-10                                                  | <i>Acartia</i> spp.          | 3                          |            |   |
|                                                              |                                                             | <i>Centropages hamatus</i>   | 3                          |            |   |
|                                                              |                                                             | <i>Temora longicornis</i>    | 1                          |            |   |
|                                                              | <b>By5</b><br>Bornholm Deep<br>Lat:55.24998<br>Lon:15.98420 | 2019-06-15                   | <i>Acartia</i> spp.        |            | 3 |
|                                                              |                                                             |                              | <i>Centropages hamatus</i> |            | 4 |
| <i>Temora longicornis</i>                                    |                                                             |                              | 5                          |            |   |
| <i>Evadne nordmanni</i>                                      |                                                             |                              | 3                          |            |   |
| 2020-09-09                                                   |                                                             | <i>Acartia</i> spp.          | 2                          |            |   |
|                                                              |                                                             | <i>Centropages hamatus</i>   | 4                          |            |   |
|                                                              |                                                             | <i>Temora longicornis</i>    | 2                          |            |   |

**Table S3:** Primers and sequences used in this study.

| <b>Name</b> | <b>Sequence</b>                                                          | <b>Function</b>                                          | <b>Reference</b> |
|-------------|--------------------------------------------------------------------------|----------------------------------------------------------|------------------|
| 341F        | [Adapter1]-CCTACGGGNGGCWGCAG                                             | 16S V3-V4 Forward primer                                 | 43-44            |
| 805R        | [Adapter2]-GACTACHVGGGTATCTAATCC                                         | 16S V3-V4 Reverse primer                                 | 43-44            |
| Adapter1    | ACACTCTTCCCTACACGACGCTCTCCGATCT                                          | Linking outer and inner PCR                              | 44               |
| Adapter2    | AGACGTGTGCTCTCCGATCT                                                     | Linking outer and inner PCR                              | 44               |
| Handle1     | AATGATACGGCGACCACCGAGATCTACAC-<br>[IndexF]-[Adapter1]                    | Forward read Illumina handle                             | 44               |
| Handle2     | CAAGCAGAAGACGGCATACGAGAT-[IndexR]-<br>[Adapter2]                         | Reverse read Illumina handle                             | 44               |
| Index       | NNNNNN<br>16 unique forward sequences and 15 unique<br>reverse sequences | Unique hexamer combination<br>for sample identification. | 44               |

**Data S1:** All data, code, and a tutorial needed to build the model and reproduce all figures and results from this study are deposited in the Zenodo repository available at <https://doi.org/10.5281/zenodo.7586799>.
